# Supplementary material
Source: PubMed Central journal article supplement (PMC6708496)

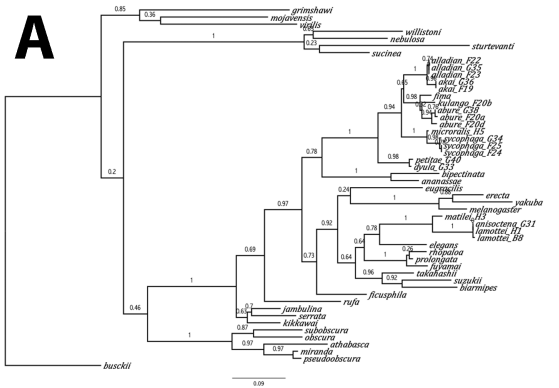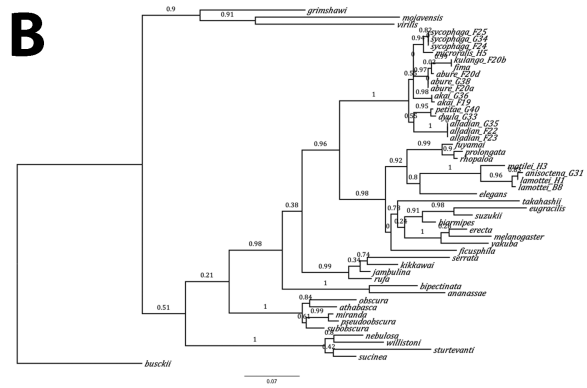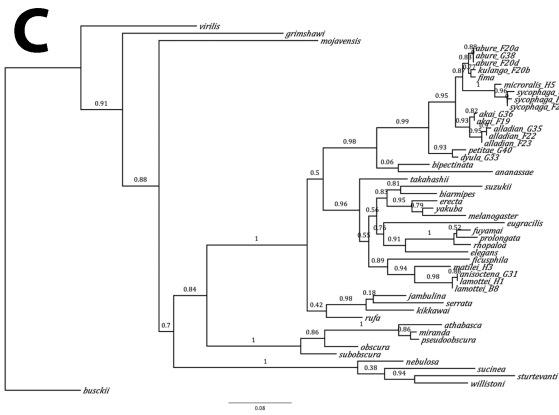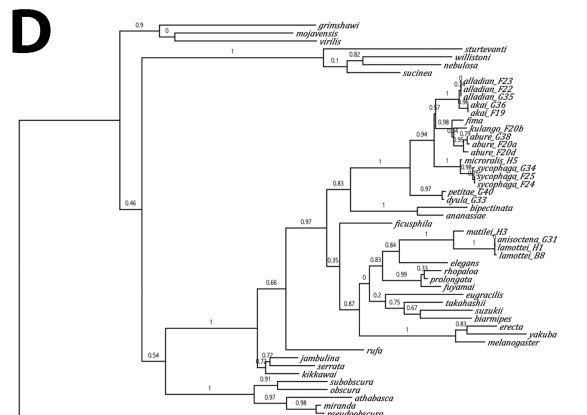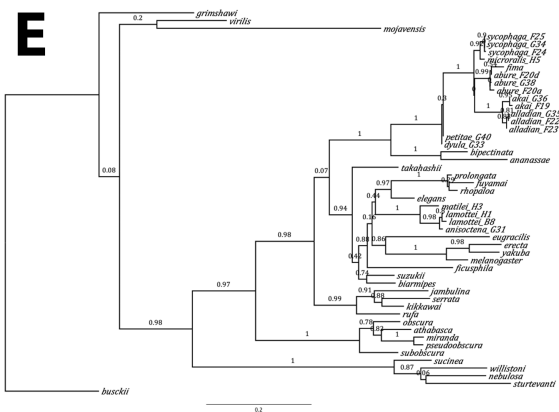

Supplement: NIHMS1533713-supplement-1.pdf [file NIHMS1533713-supplement-1.pdf]

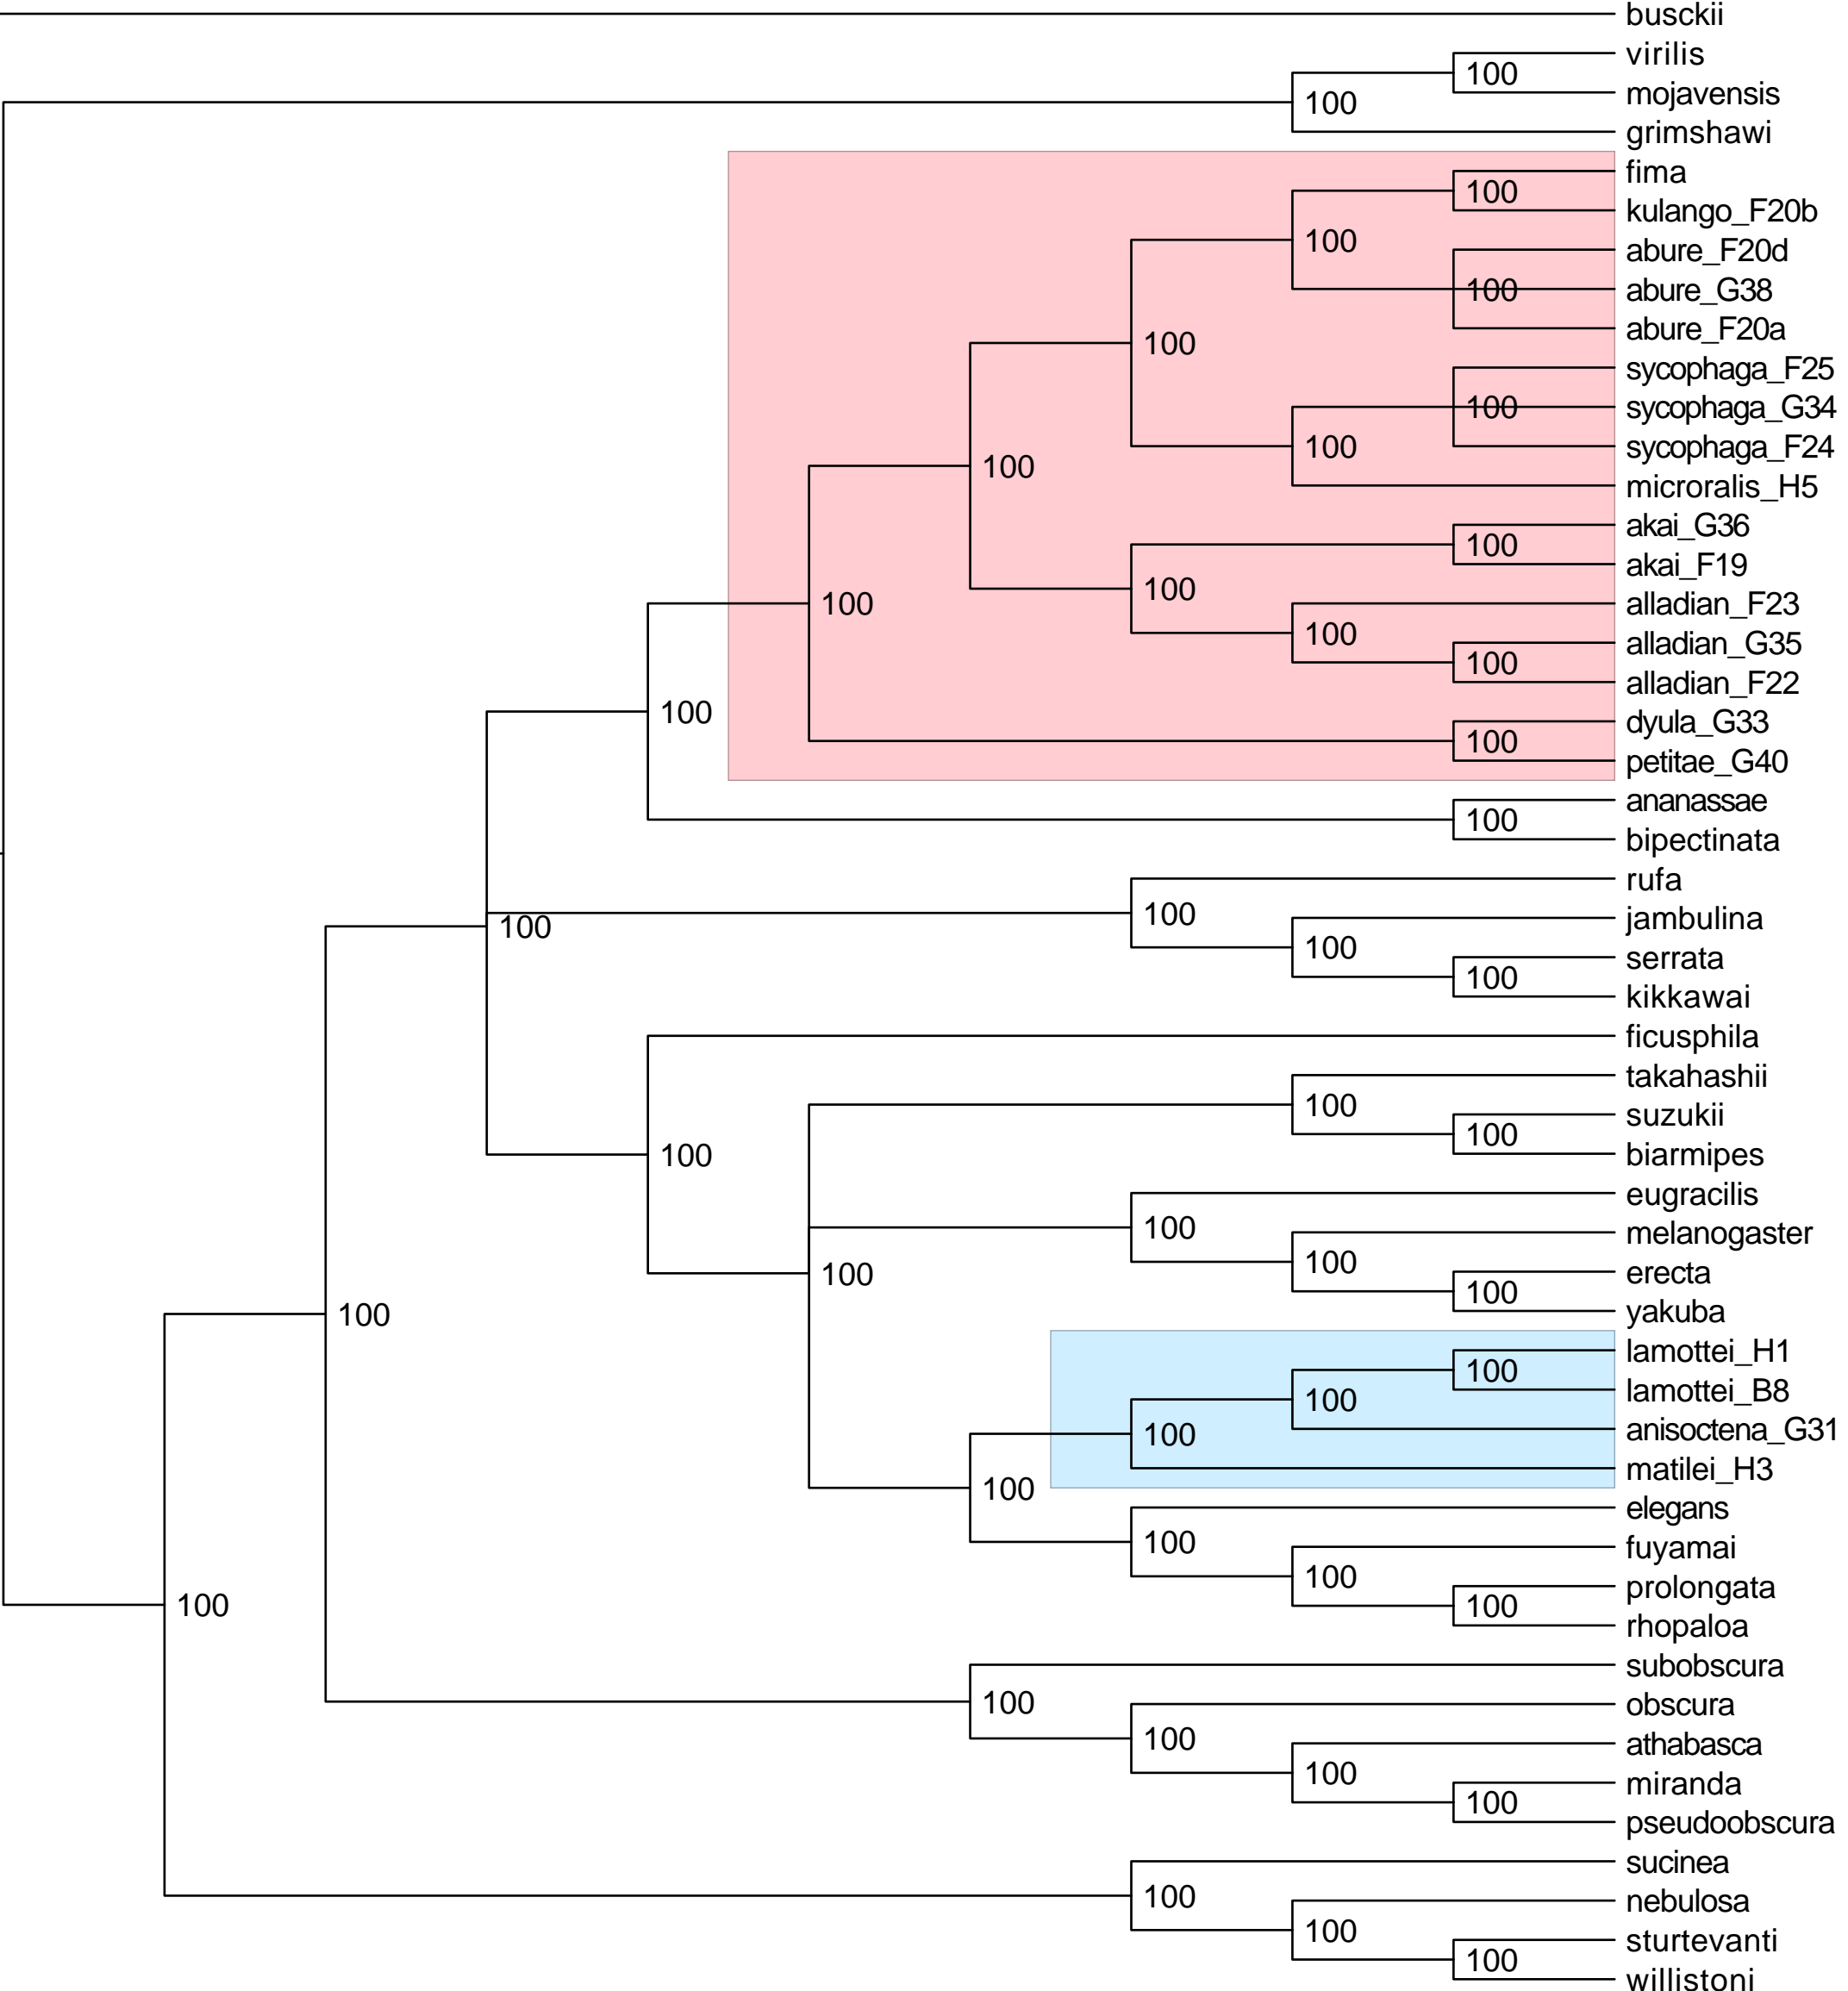

3.0

Supplement: NIHMS1533713-supplement-2.pdf [file NIHMS1533713-supplement-2.pdf]

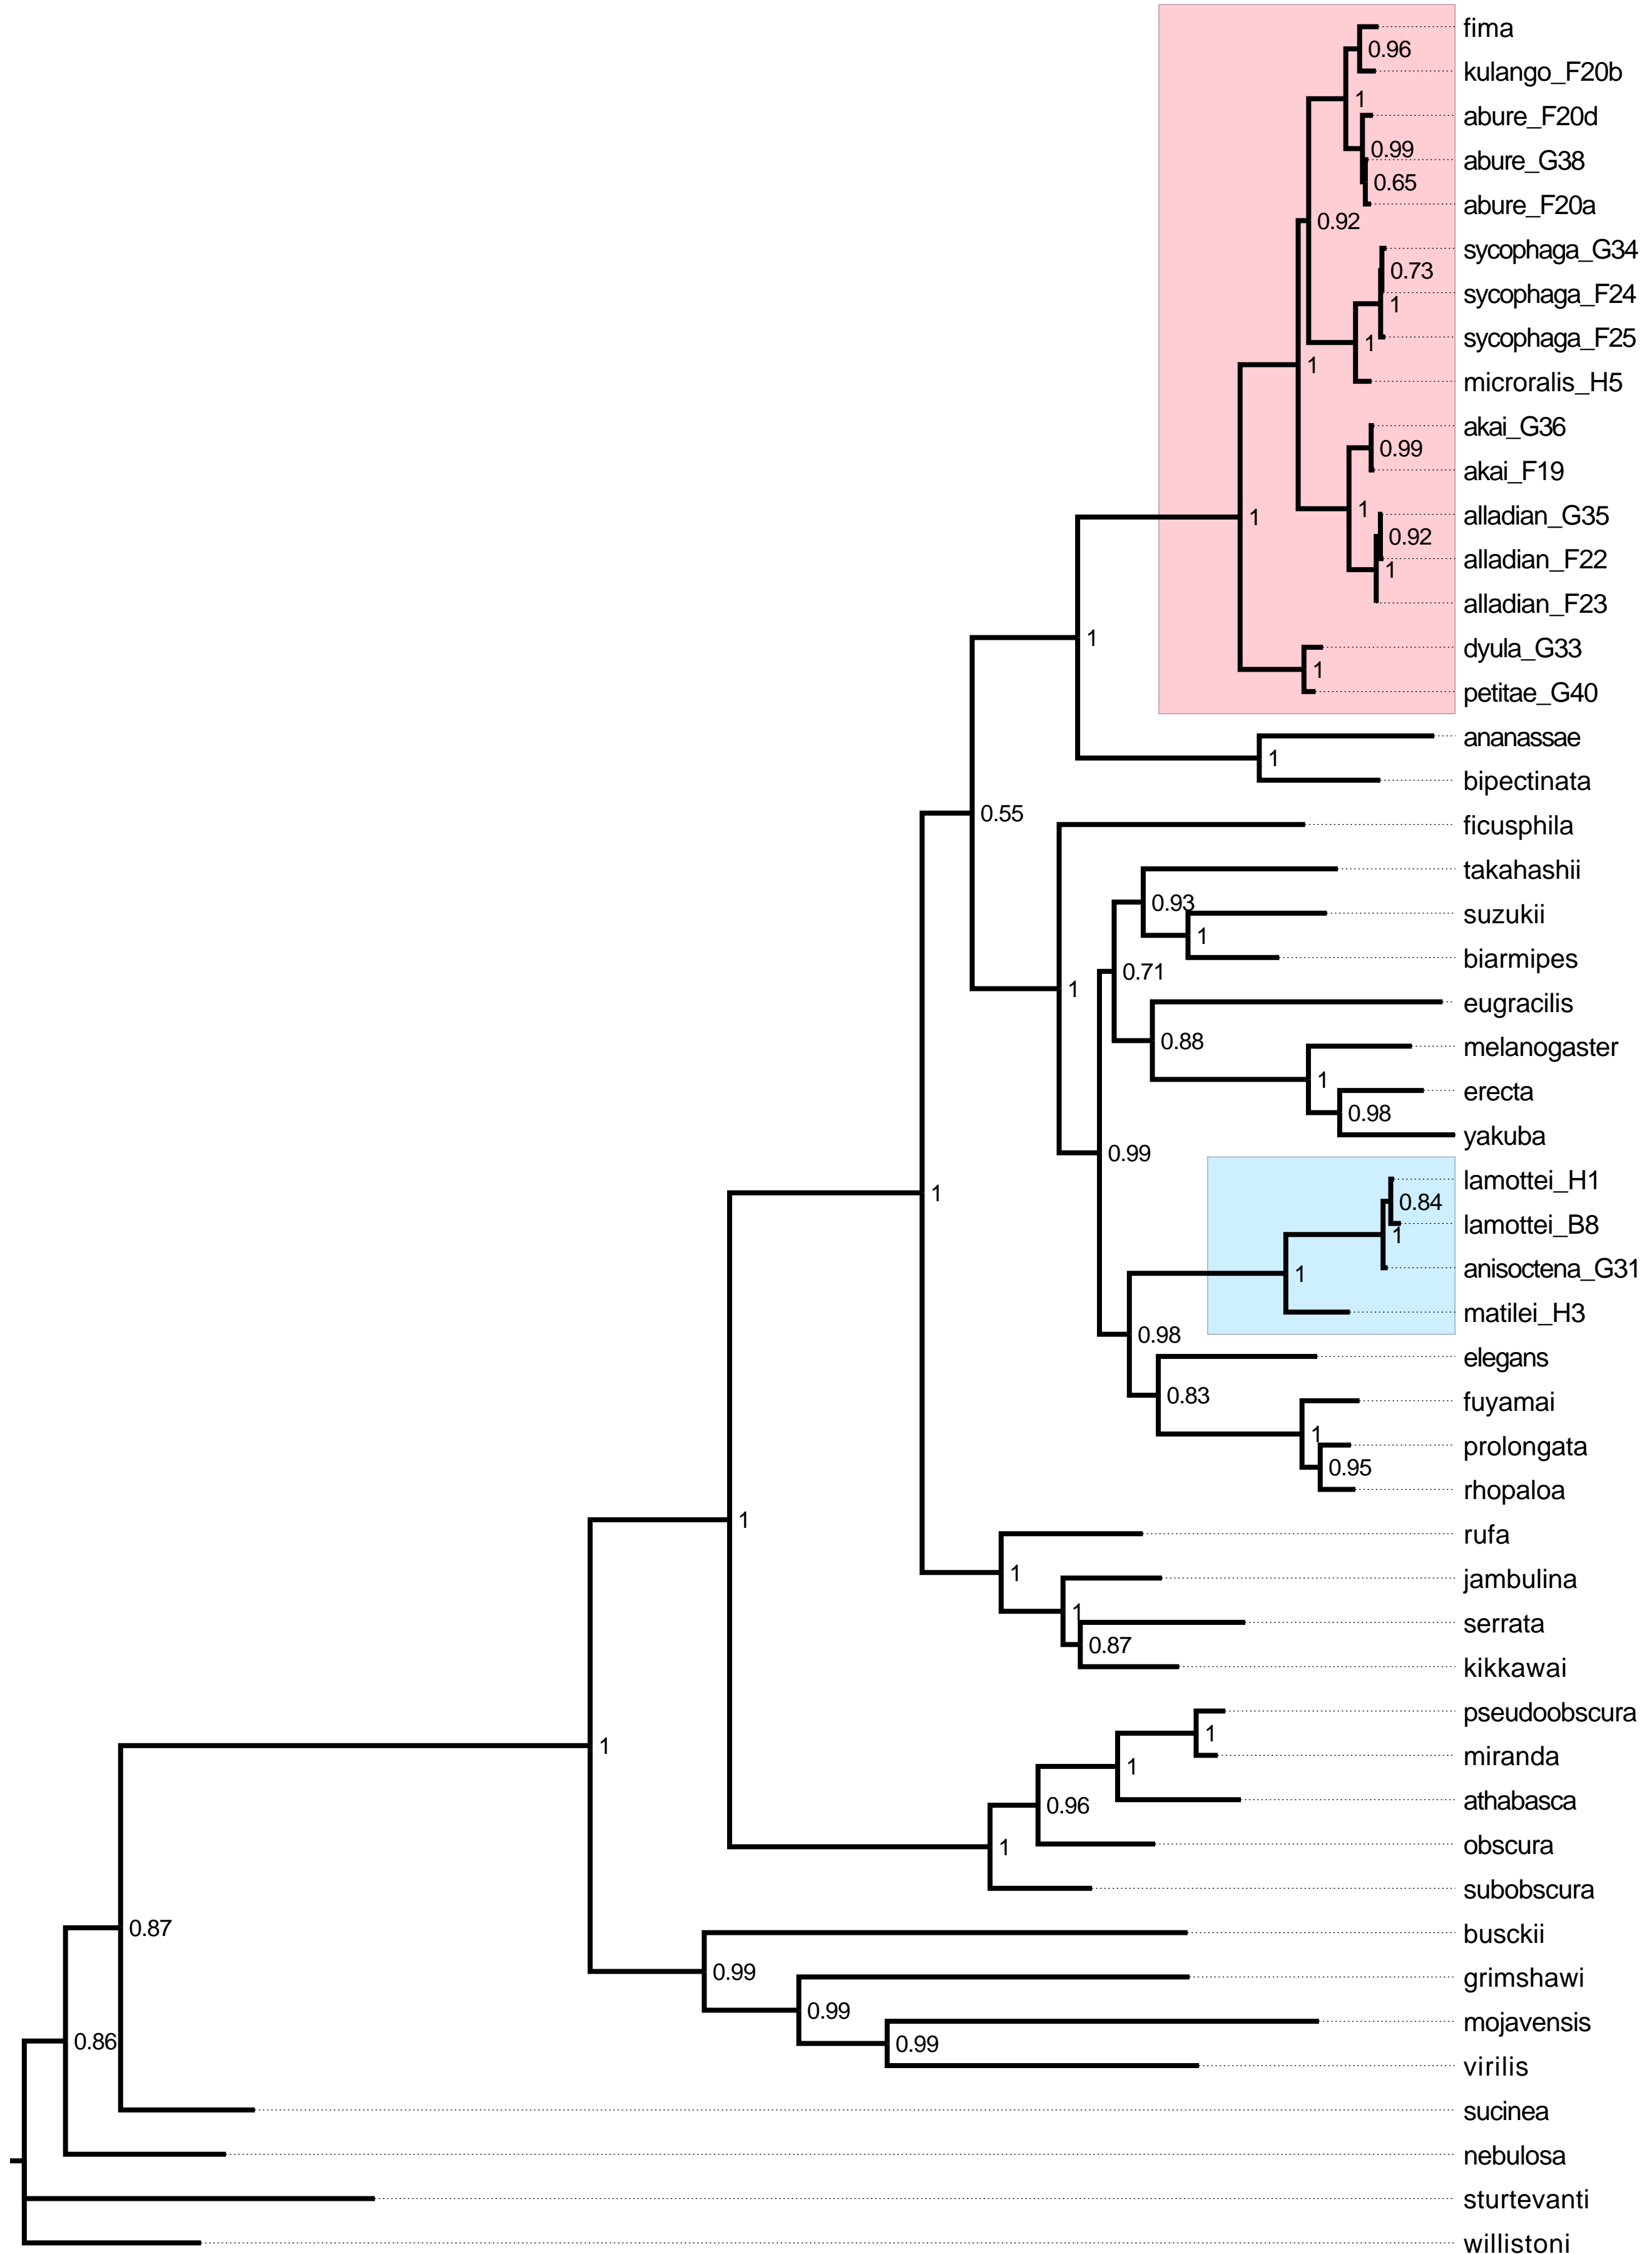

Supplement: NIHMS1533713-supplement-3.pdf [file NIHMS1533713-supplement-3.pdf]
